# Supplementary material for: Core non-coding RNAs of Piscirickettsia salmonis
Source: PLoS One. 2018 May 16;13(5):e0197206. doi: 10.1371/journal.pone.0197206 (PMC5955585; doi:10.1371/journal.pone.0197206)
Supplement: S4 Table — (XLSX) [file pone.0197206.s004.xlsx]

## Sheet: Hoja1
S4 Table. RNA-RNA interaction against Piscirickettsia salmonis
ncRNA	Target	ΔG	Target_ID
CsrC	hyp_prot_C200_RS14095	-39.6418	C200_RS14095
CsrC	hyp_prot_WP_033923871	-31.6638	WP_033923871
CsrC	PurM-like	-19.5981	WP_032126665
CsrC	glycine_dehydrogenase	-18.2337	WP_016209900
CsrC	MurJ	-17.6325	WP_016210758
CsrC	hyp_prot_WP_032126324	-17.1115	WP_032126324
CsrC	phosphopentomutase	-16.7376	WP_016211224
CsrC	hyp_prot_WP_016209637	-16.2213	WP_016209637
CsrC	motA/TolQ/ExbB	-16.1774	WP_016211119
CsrC	glycerol_kinase	-15.9417	WP_016211650
CsrC	ATP_synthase_subunit_beta	-15.7981	WP_016209339
CsrC	hyp_prot_WP_016212267	-15.6173	WP_016212267
Prrb_RsmZ	hyp_prot_WP_033923871	-32.3936	WP_033923871
Prrb_RsmZ	hyp_prot_C200_RS14095	-31.4109	C200_RS14095
Prrb-RsmZ	long-chain-fatty-acid--CoA_ligase	-18.3094	WP_032126615
Prrb_RsmZ	glycine_dehydrogenase	-18.215	WP_016209900
Prrb_RsmZ	CheA	-17.6072	WP_016209798
Prrb_RsmZ	hyp_prot_WP_032126324	-17.5733	WP_032126324
Prrb_RsmZ	phosphopentomutase	-16.6367	WP_016211224
Prrb_RsmZ	hyp_prot_WP_016209637	-16.2973	WP_016209637
MicX	hyp_prot_WP_016212383	-19.5404	WP_016212383
MicX	hyp_prot_WP_033923871	-19.4053	WP_033923871
MicX	hyp_prot_C200_RS14095	-18.319	C200_RS14095
MicX	hyp_prot_WP_016209922	-17.7319	WP_016209922
MicX	MexH_multidrug_efflux	-17.6405	WP_016209619
MicX	amino_acid_permease	-16.4884	WP_016211238
MicX	hyp_prot_WP_052047106	-16.2195	WP_052047106
MicX	acetyl-CoA acetyltransferase	-16.148	WP_016209285
MicX	hyp_prot_WP_016212318	-15.9252	WP_016212318
MicX	ABC_transporter	-15.6051	WP_016210907
MicX	hyp_prot_WP_016210131	-15.5735	WP_016210131
MicX	ThiC	-15.5645	WP_016211188
MicX	hyp_prot_WP_016211567	-15.4861	WP_016211567
MicX	helicase_C-terminal	-15.4509	WP_016210751
MicX	SecA	-15.3103	WP_016209352
MicX	TolC	-15.3101	WP_032126547
MicX	hyp_prot_WP_016209494	-15.2925	WP_016209494
MicX	hyp_prot_WP_016209378	-15.0937	WP_016209378
sX4	oligoribonuclease	-21.7923	WP_051307357
sX4	hyp_prot_WP_016211576	-18.0857	WP_016211576
sX4	arginine_decarboxylase	-17.8195	WP_016209712
sX4	purT	-17.7814	WP_016210595
sX4	lipoyl_synthase	-17.6703	WP_016210379
sX4	dihydrolipoyl_dehydrogenase	-17.3879	WP_016209860
sX4	hyp_prot_C200_RS14095	-17.243	C200_RS14095
sX4	oxygen_tolerance	-17.1276	WP_016211085
sX4	endonuclease/exonuclease/phosphatase	-17.0916	WP_016209843
sX4	hyp_prot_WP_016211978	-16.8066	WP_016211978
sX4	glutaminase	-16.3684	WP_016212202
sX4	formimidoylglutamase	-15.8757	WP_016210559
sX4	hyp_prot_C200_RS01675	-15.5718	C200_RS01675
sX4	ParB	-15.5599	WP_016212121
sX4	hyp_prot_WP_032126585	-15.4839	WP_032126585
sX4	UDP-N-acetylmuramate_ligase	-15.3172	WP_016210672
sX4	acetyl-CoA acetyltransferase	-15.1462	WP_016210021
Table supplementary 4. RNA-RNA interaction between the four selected ncRNA CsrC, PrrB_RsmZ, MicX, s4 and coding sequences of P. salmonis. We used as a cutoff a minimun of free energy DG of -15
